# Supplementary figures and images for: Desulfovibrio desulfuricans and its derived metabolites confer resistance to FOLFOX through METTL3
Source: PubMed Central journal article supplement — eBioMedicine. 2024 Mar 13;102:105041. doi: 10.1016/j.ebiom.2024.105041 (PMC10950750; doi:10.1016/j.ebiom.2024.105041), 2024-03-13

**Figure 6**

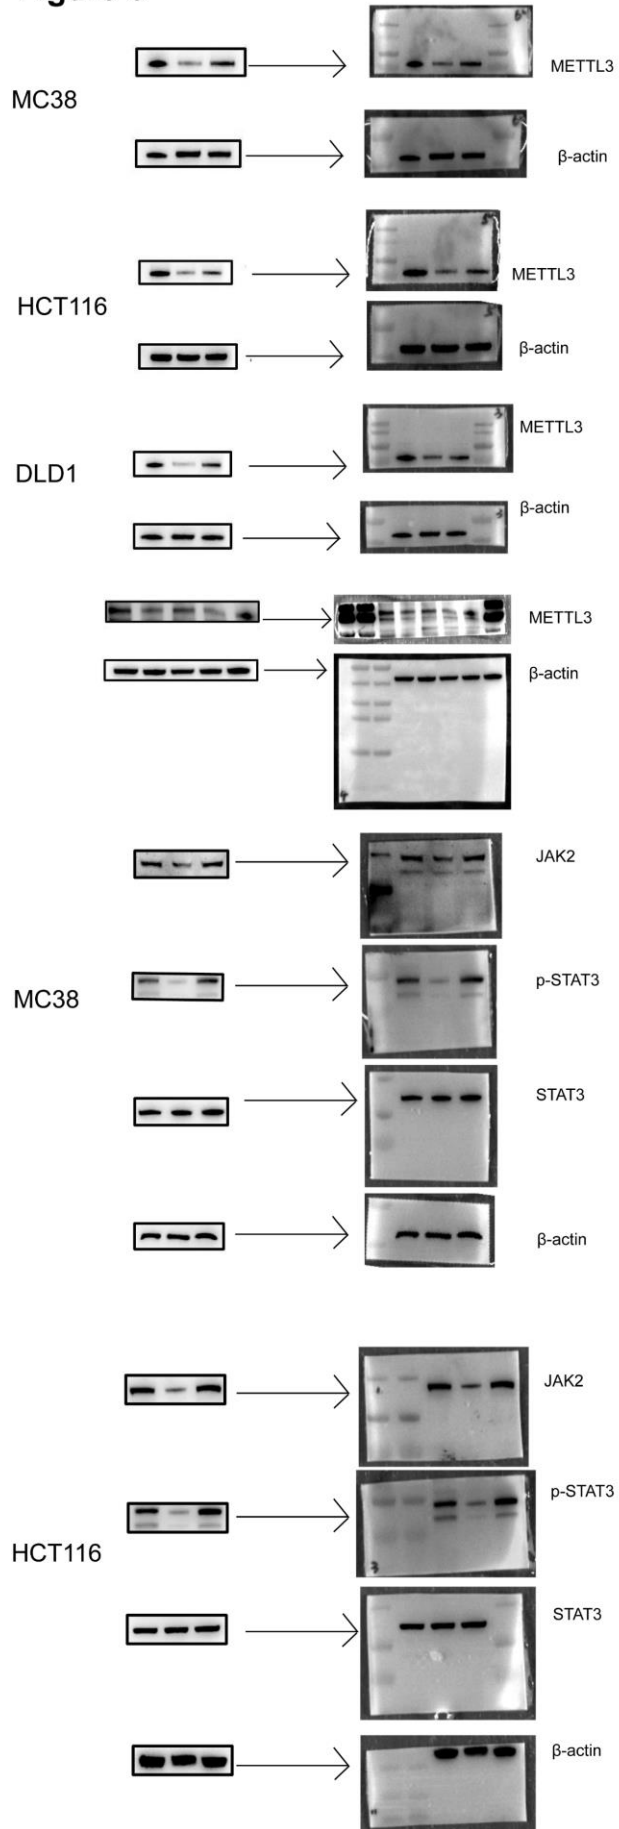

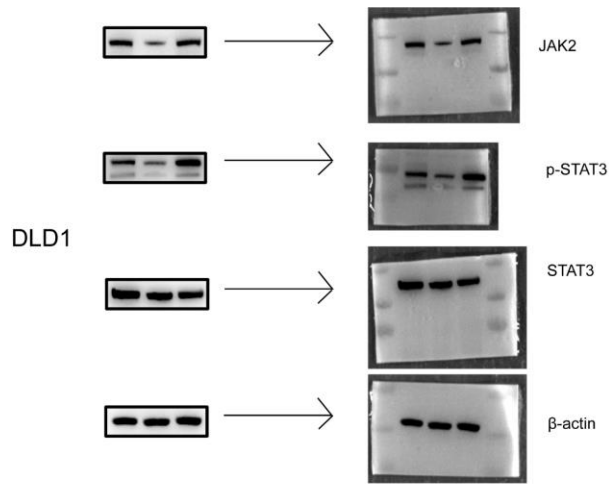

**Figure7**

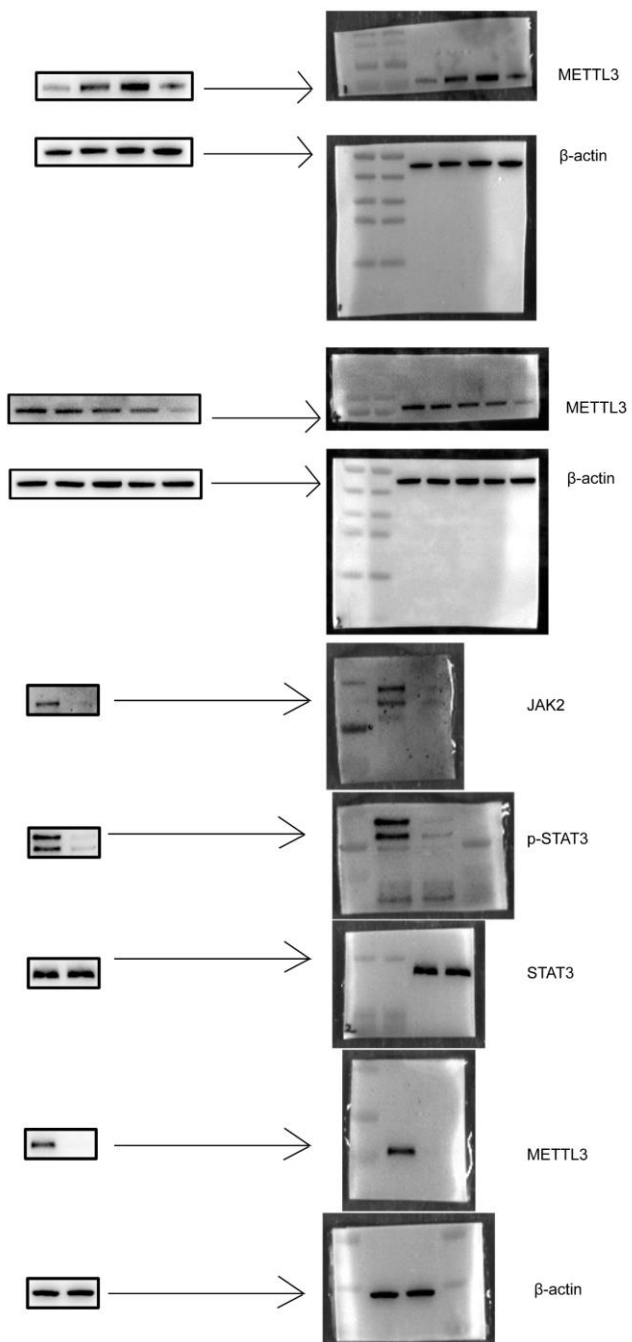

**FigureS2**

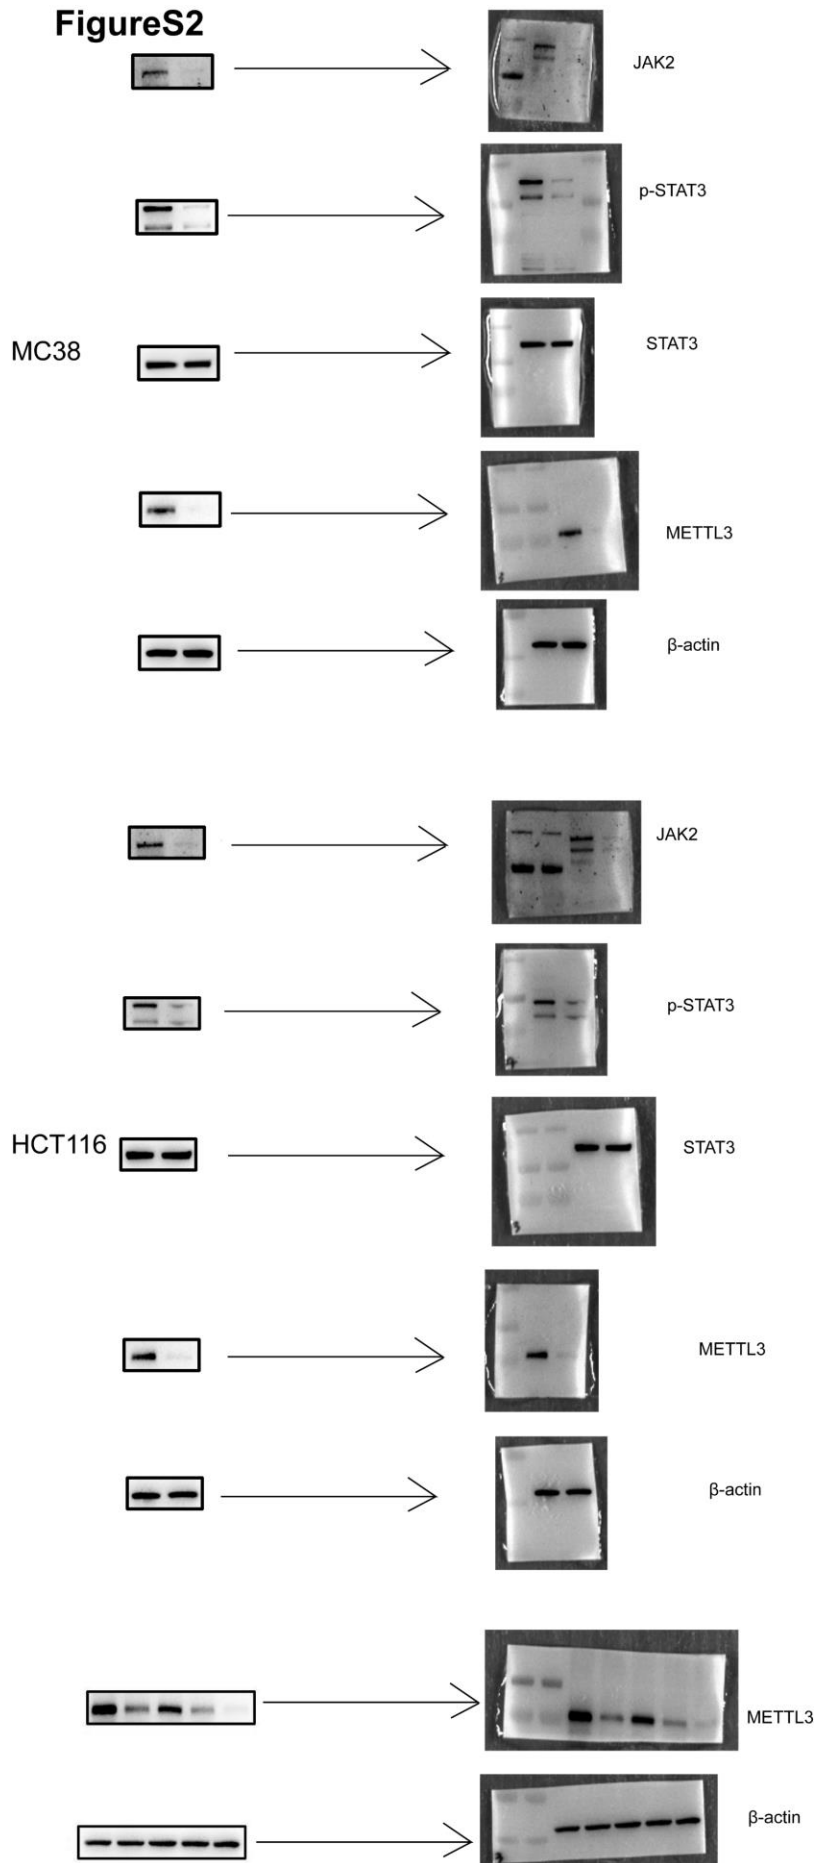

Supplement: mmc2.pdf [file mmc2.pdf]
